# Supplementary material for: Targeting intracellular MMPs efficiently inhibits tumor metastasis and angiogenesis
Source: PubMed Central journal article supplement — Theranostics. 2018 Apr 15;8(10):2830–45. doi: 10.7150/thno.23209 (PMC5957012; doi:10.7150/thno.23209), 2018-04-15
Supplement: thnov08p2830s1.pdf [file thnov08p2830s1.pdf]

## Supplementary Materials

### **Targeting intracellular MMPs efficiently inhibits tumour metastasis and angiogenesis**

*Yaqi Lv<sup>a</sup>, Xiangmei Zhao<sup>a</sup>, Lidan Zhu<sup>a</sup>, Sijia Li<sup>a</sup>, Qingqing Xiao<sup>a</sup>, Wei He\*<sup>a</sup>, Lifang Yin\*<sup>a,b</sup>*

<sup>a</sup> Department of Pharmaceutics, School of Pharmacy, China Pharmaceutical University, Nanjing, 210009, P.R. China

<sup>b</sup> Key Laboratory of Druggability of Biopharmaceutics, China Pharmaceutical University, Nanjing, 210009, PR China

E-mail: lifangyin\_@163.com (L.F. Yin), weihe@cpu.edu.cn (W. He)

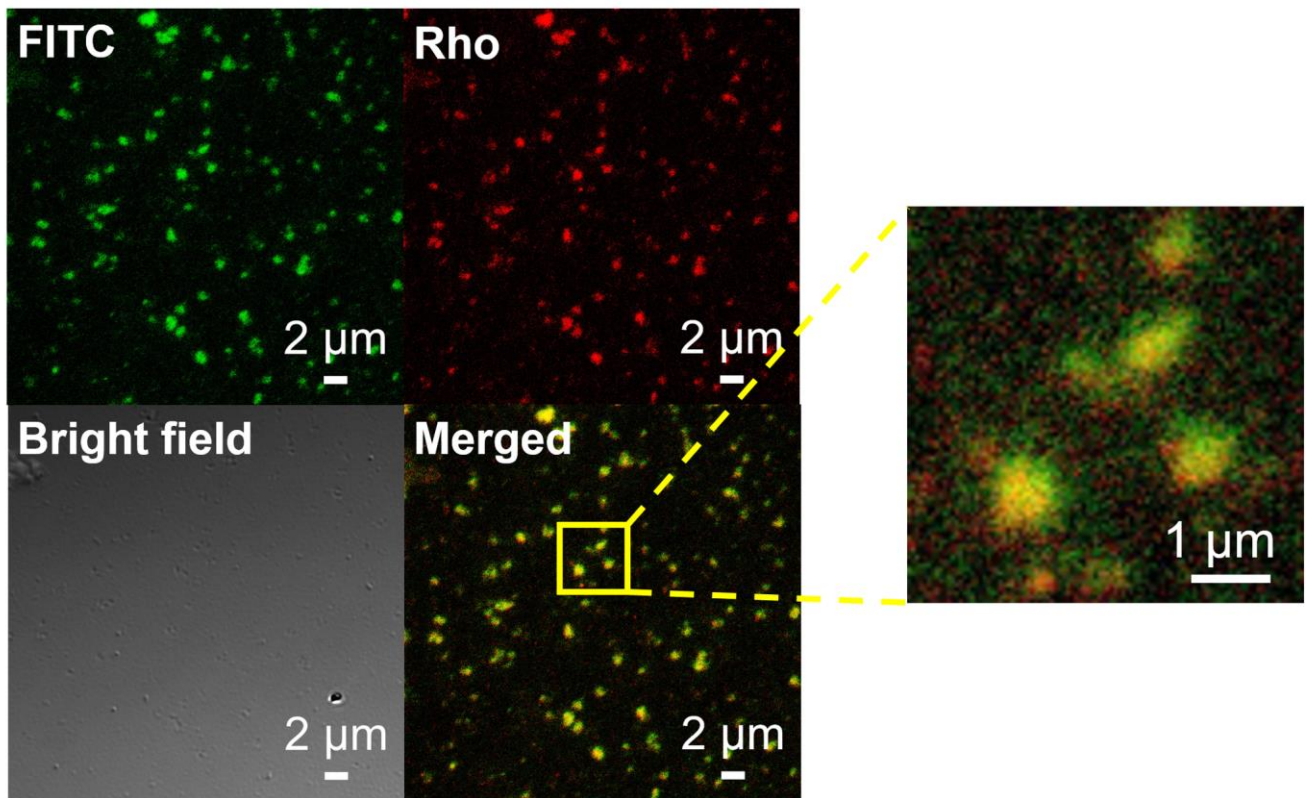

**Figure S1.** CLSM images of HPMC NPs at a FITC-HA-PTX/Rho-MATT/CN mass ratio of 2:1. The FITC and Rho concentrations were both 800 ng/mL. Yellow fluorescence indicates the assembly of FITC-HA-PTX and Rho-MATT/CN.

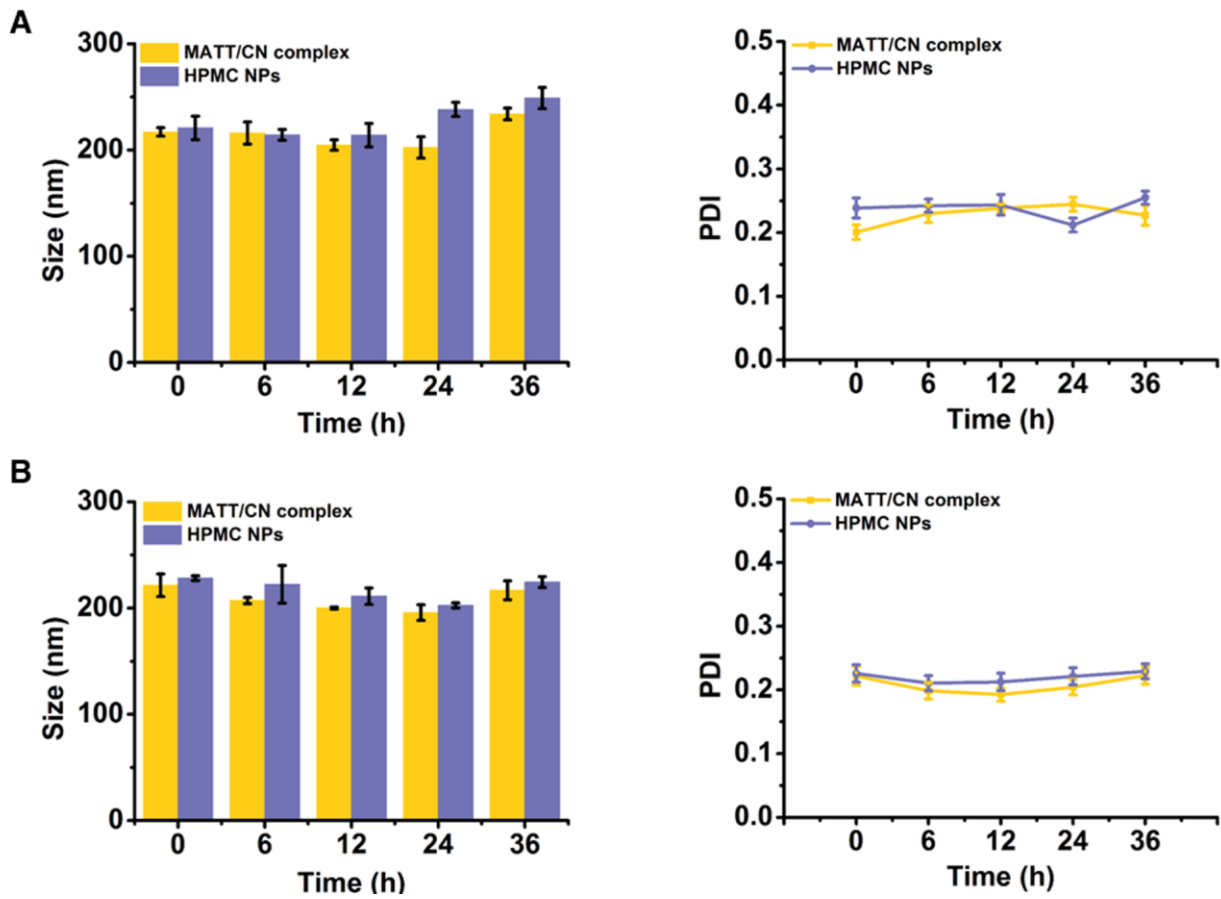

**Figure S2.** Stability study of MATT/CN complex or HPMC NPs in (A) PBS (pH 7.4) and (B) RPMI1640 containing 10% FBS in terms of particle size and PI at 37 °C.

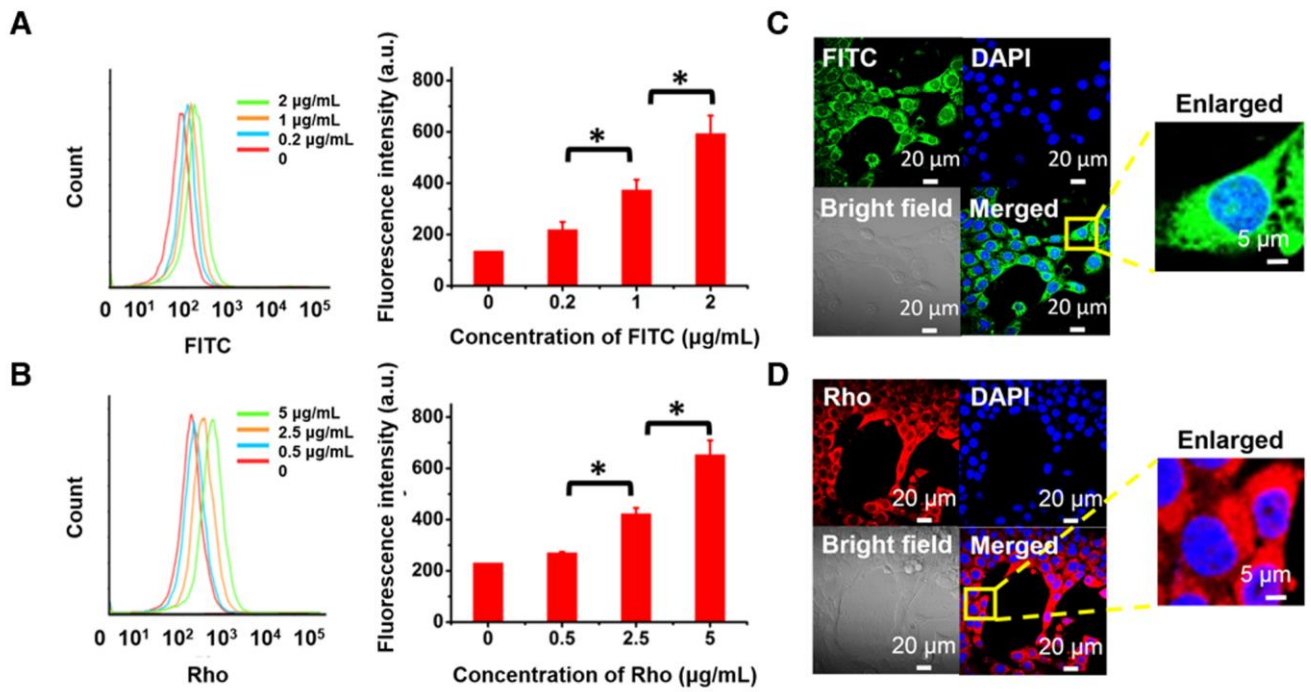

**Figure S3.** Cellular uptake. Concentration-related uptake of (A) FITC-HPMC NPs and (B) Rho-HPMC NPs measured by flow cytometry after incubation with 4T1 cells for 4 h at 37 °C. CLSM images of (C) FITC-HPMC NPs (green) and (D) Rho-HPMC NPs (red) after incubation for 4 h at 37 °C at FITC or Rho concentrations of 800 ng/mL. The nuclei were stained with DAPI (blue).

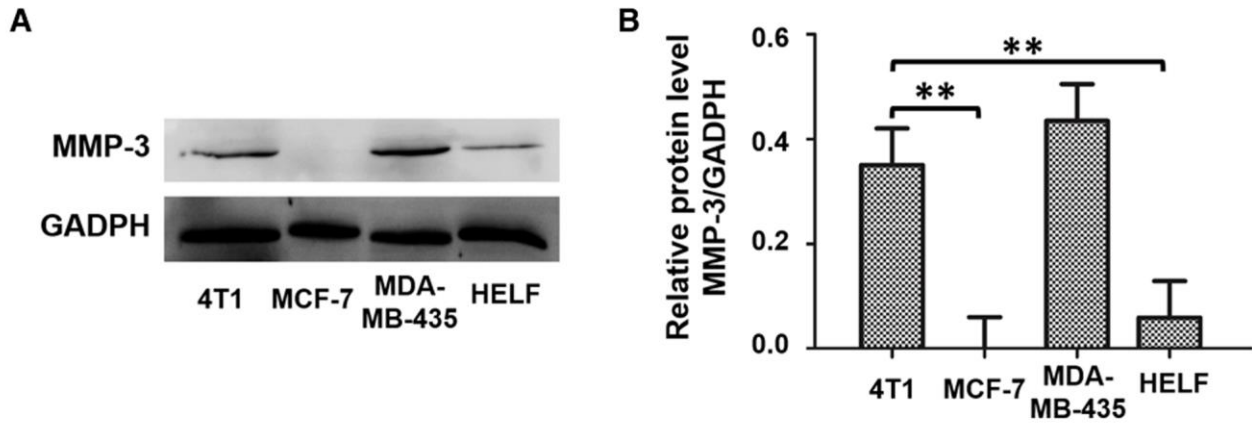

**Figure S4.** Western blotting analysis of MMP-3 expression. (A) MMP-3 expression in different cell lines. GADPH was used as a loading control. Dark bands indicate MMP-3 expression. (B) Quantitative analysis of the MMP-3 expression. (mean  $\pm$  S.D.,  $n = 3$ ,  $**P < 0.01$ ).

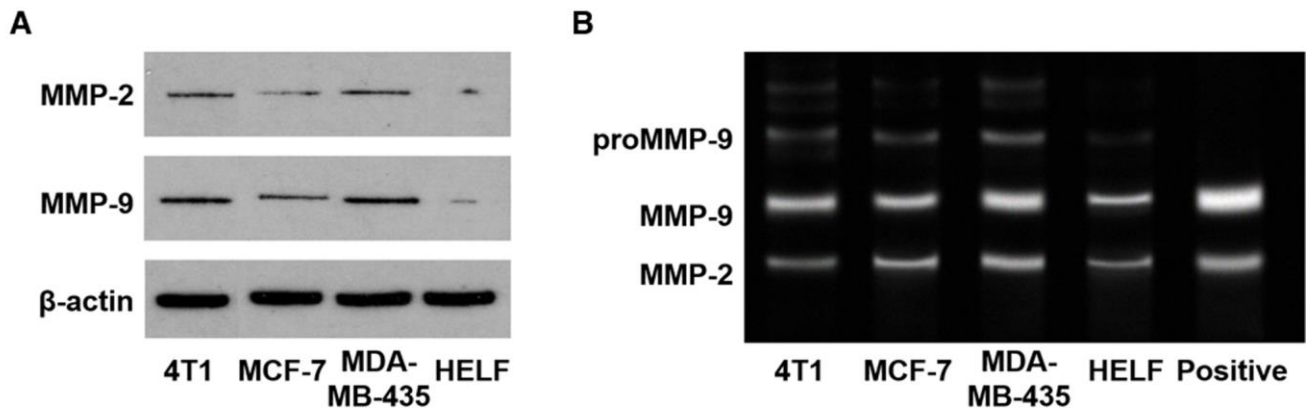

**Figure S5.** MMP expression and activities in different cell lines. **(A)** Western blotting analysis of MMP-2 and MMP-9 expression.  $\beta$ -Actin was used as a loading control. Dark bands indicate MMP expression. **(B)** Activities of MMP-2 and MMP-9 analysed by gelatine zymography. Bright bands on the dark background indicate MMP activity.

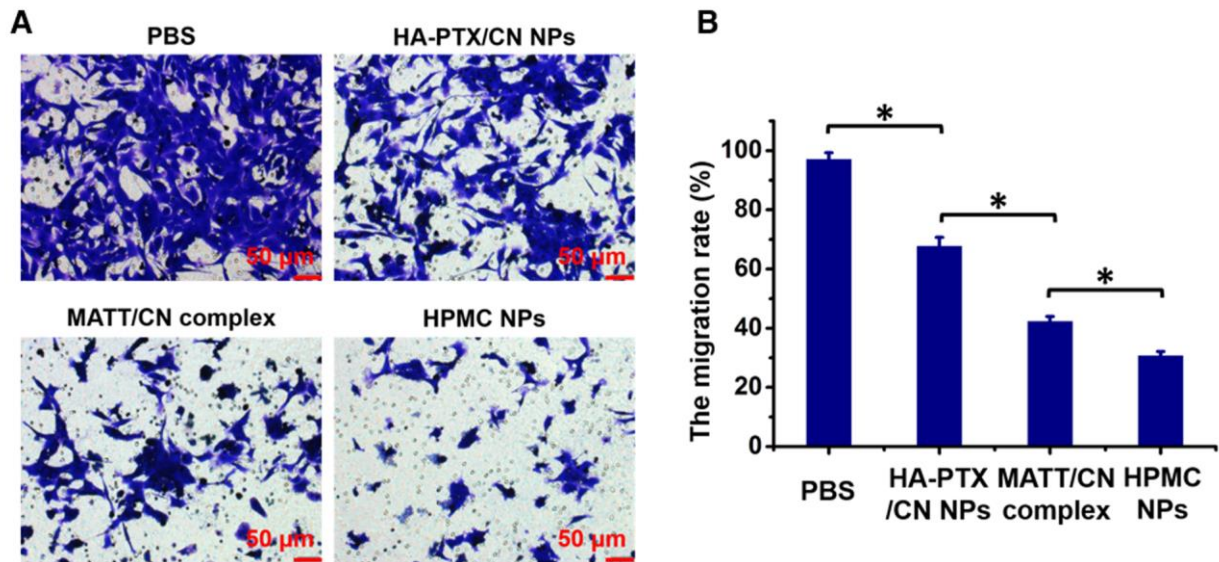

**Figure S6.** Anti-metastasis study. (A) Microscopy images of cell invasion using a Matrigel<sup>®</sup> transwell assay after incubation with HPMC NPs at PTX and MATT concentrations of 2  $\mu\text{g/mL}$  and 5  $\mu\text{g/mL}$ , respectively, for 24 h at 37  $^{\circ}\text{C}$ . The migrated cells were stained with 0.1% crystal violet at 25  $^{\circ}\text{C}$ . The scale bar is 50  $\mu\text{m}$ . (B) Quantitative analysis of the migrated cells by determining the optical density (OD) ratio of stained crystal violet with a microplate reader at 570 nm. The data was presented as the mean  $\pm$  s.e.m. ( $n = 3$ ,  $*P < 0.05$ ,  $**P < 0.01$ ).

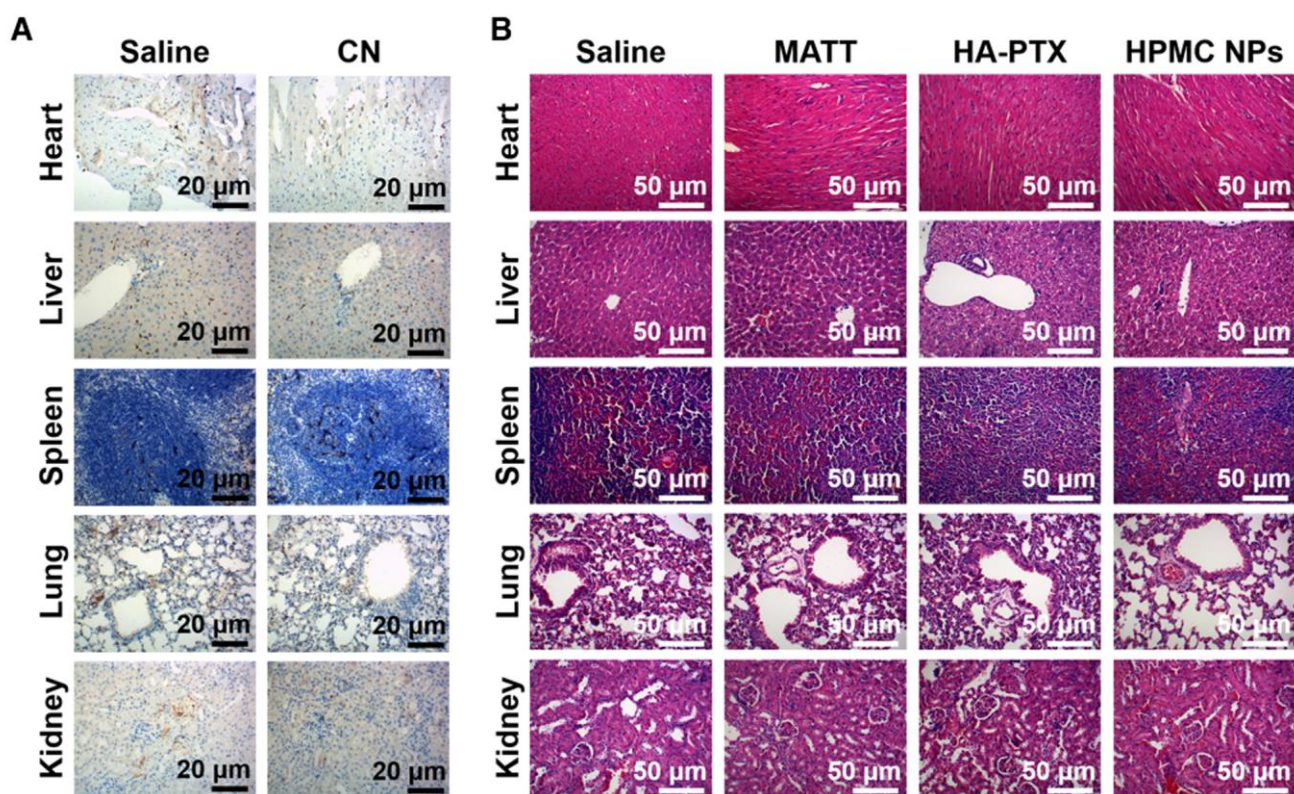

**Figure S7. Safety examination.** Normal mice were injected with blank  $\beta$ -CN, MATT, HA-PTX, or HPMC NPs via a tail vein injection every 3 days at doses of 2 mg/kg for PTX and 5 mg/kg for MATT, respectively, for 5 times. The injection volume was 0.2 mL. CN were injected at the same dose as HPMC NPs. The main organs (i.e., heart, liver, spleen, lung, and kidney) were collected on post-injection day 16 and (A) CD68 and (B) H&E analyses were conducted. Saline was used as a control.



**Table S1.** Size, PDI and zeta potential of nanoparticles.

| <b>Formulations</b> | <b>Size</b>       | <b>PDI</b>        | <b>Zeta potential</b> |
|---------------------|-------------------|-------------------|-----------------------|
| $\beta$ -CN         | 204.83 $\pm$ 4.74 | 0.041 $\pm$ 0.009 | -27.32 $\pm$ 1.27     |
| MATT/CN complex     | 192.77 $\pm$ 4.89 | 0.097 $\pm$ 0.021 | -6.85 $\pm$ 3.08      |
| HA-PTX/CN NPs       | 250.83 $\pm$ 1.74 | 0.137 $\pm$ 0.015 | -8.98 $\pm$ 1.96      |
| HPMC NPs            | 233.87 $\pm$ 6.13 | 0.133 $\pm$ 0.015 | -8.53 $\pm$ 1.77      |

**Table S2.** Stern–Volmer quenching rate constant ( $K_{sv}$ ), fluorescence quenching rate constant ( $K_q$ ), and binding constant ( $K_a$ ) at different temperatures.

| Formulations      | $T$ (K) | $K_{sv}$ (mg/mL <sup>-1</sup> ) | $K_q$ (mg/mL <sup>-1</sup> s <sup>-1</sup> ) | $n$ | $K_a$  |
|-------------------|---------|---------------------------------|----------------------------------------------|-----|--------|
| MATT/CN complex   | 288     | 0.1461                          | $1.46 \times 10^7$                           | 1.2 | 0.0107 |
|                   | 298     | 0.2956                          | $2.96 \times 10^7$                           | 0.8 | 0.296  |
|                   | 310     | 0.2664                          | $2.66 \times 10^7$                           | 0.5 | 0.257  |
| HA-PTX/CN complex | 288     | 0.1133                          | $1.13 \times 10^7$                           | 0.5 | 0.057  |
|                   | 298     | 0.2119                          | $2.12 \times 10^7$                           | 0.8 | 0.234  |
|                   | 310     | 0.0925                          | $9.25 \times 10^6$                           | 1.1 | 0.0868 |
| HPMC NPs          | 288     | 0.3363                          | $3.36 \times 10^7$                           | 0.1 | 0.399  |
|                   | 298     | 0.8786                          | $8.79 \times 10^7$                           | 0.2 | 1.15   |
|                   | 310     | 0.4783                          | $4.78 \times 10^7$                           | 0.5 | 0.497  |

**Table S3.** Hematologic analysis of mice after five *i.v.* injections of different formulations ( $n = 3$ )

| <b>Formulations</b> | <b>WBC</b>                   | <b>RBC</b>                      | <b>PLT</b>                   | <b>HGB</b> | <b>HCT</b> |
|---------------------|------------------------------|---------------------------------|------------------------------|------------|------------|
|                     | <b>(<math>10^9/L</math>)</b> | <b>(<math>10^{12}/L</math>)</b> | <b>(<math>10^9/L</math>)</b> | <b>g/L</b> | <b>%</b>   |
| Normal ranges       | 5.1-11.6                     | 7.7-12.5                        | 100-1000                     | 122-162    | 42-44      |
| Saline              | 7.26±3.69                    | 8.34±0.47                       | 701.0±36.78                  | 138.0±7.07 | 43.55±1.34 |
| β-CN                | 6.07±1.40                    | 7.82±0.50                       | 594.5±221.3                  | 129.5±2.12 | 43.05±0.35 |
| MATT                | 5.84±0.66                    | 8.40±0.22                       | 543.0±106.1                  | 132.5±3.54 | 43.30±0.57 |
| HA-PTX              | 6.40±2.03                    | 7.83±0.44                       | 548.0±230.5                  | 131.0±9.90 | 42.95±2.62 |
| HPMC NPs            | 7.12±0.35                    | 8.35±0.64                       | 665.0±100.4                  | 140.0±2.83 | 45.45±0.92 |

white blood cell, WBC; red blood cell, RBC; platelet, PLT; hemoglobin, HGB; hematocrit, HCT
